# Supplementary material
Source: PubMed Central journal article supplement (PMC2775488)

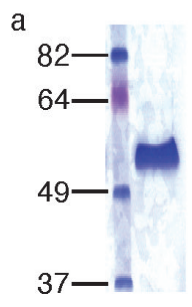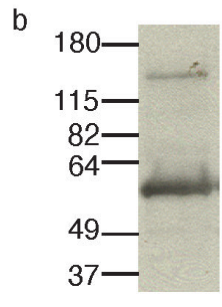

Supplement: NIHMS67290-supplement-4.pdf [file NIHMS67290-supplement-4.pdf]

a

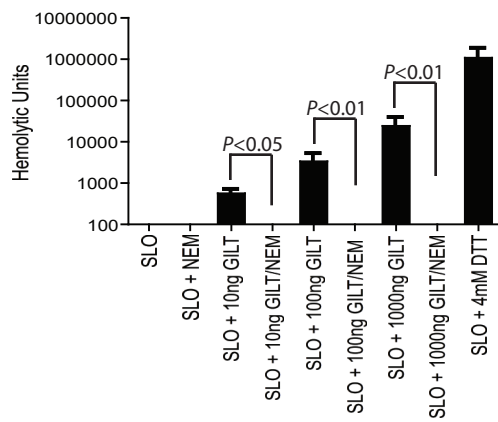

b

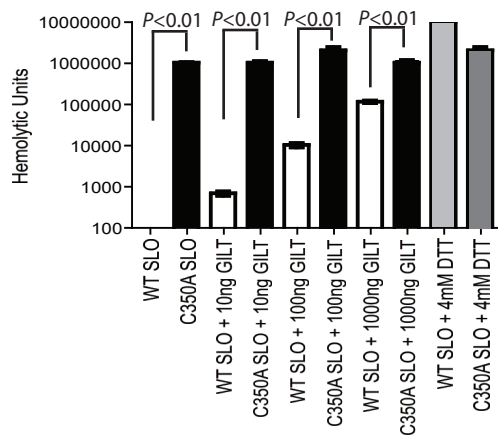

Supplement: NIHMS67290-supplement-5.pdf [file NIHMS67290-supplement-5.pdf]
